# Supplementary material for: Strong acceleration of glacier area loss in the Greater Caucasus between 2000 and 2020
Source: Copernicus journal article supplement (doi:10.5194/tc-16-489-2022), 2022-02-10
Supplement: Supplementary file [file tc-16-489-2022-supplement.pdf]

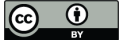

*Supplement of*

## **Strong acceleration of glacier area loss in the Greater Caucasus between 2000 and 2020**

**Levan G. Tielidze et al.**

*Correspondence to:* Levan G. Tielidze (tielidzelevan@gmail.com)

The copyright of individual parts of the supplement might differ from the article licence.

## Supplemental Tables

**Table S1.** Satellite images and digital elevation models used in this study. Figure 1 shows where the scenes are located.

| Satellite      | Path-Row or Tile | Date       | UTM zone | Sub-Region          | Resolution |
|----------------|------------------|------------|----------|---------------------|------------|
| Landsat 5 TM   | 169-031          | 20/08/1999 | 38N      | Eastern             | 30 m       |
| Landsat 5 TM   | 173-030          | 01/09/1999 | 37N      | Western             | 30 m       |
| Landsat 7 ETM+ | 170-030          | 28/07/2000 | 38N      | Eastern             | 15/30 m    |
| Landsat 5 TM   | 171-030          | 12/08/2000 | 38N      | Central             | 30 m       |
| Landsat 7 ETM+ | 171-030          | 05/09/2000 | 38N      | Central             | 15/30 m    |
| Landsat 7 ETM+ | 172-030          | 12/09/2000 | 37-38N   | Western and Central | 15/30 m    |
| Landsat 5 TM   | 173-030          | 05/08/2001 | 37N      | Western             | 30 m       |
| Landsat 5 TM   | 168-031          | 06/09/2002 | 38-39N   | Eastern             | 30 m       |
| Sentinel 2B    | 38TNN (2 scenes) | 15/08/2019 | 38N      | Eastern             | 10 m       |
| Sentinel 2B    | 39TTF            | 22/08/2019 | 38-39N   | Eastern             | 10 m       |
| Sentinel 2B    | 38TMN            | 23/08/2019 | 38N      | Central and Eastern | 10 m       |
| Sentinel 2B    | 38TPL (2 scenes) | 05/09/2020 | 38N      | Eastern             | 10 m       |
| Sentinel 2B    | 38TQL            | 05/09/2020 | 38-39N   | Eastern             | 10 m       |
| Sentinel 2B    | 37TEJ (3 scenes) | 04/09/2020 | 37N      | Western             | 10 m       |
| Sentinel 2B    | 37TEJ (2 scenes) | 04/09/2020 | 37-38N   | Western and Central | 10 m       |
| Sentinel 2B    | 38TLN            | 11/09/2020 | 38N      | Central             | 10 m       |
| Sentinel 2B    | 38TMN            | 11/09/2020 | 38N      | Central and Eastern | 10 m       |
| SPOT-7         | 00035202         | 29/07/2019 | 38N      | Central             | 1.5 m      |
| SPOT-6         | 00035543         | 30/07/2019 | 38N      | Central             | 1.5 m      |
| SPOT-6         | 00035203         | 30/07/2019 | 38N      | Central             | 1.5 m      |
| SPOT-6         | 00035365         | 30/07/2019 | 38N      | Central             | 1.5 m      |
| SPOT-6         | 00035200         | 13/08/2019 | 38N      | Eastern             | 1.5 m      |
| Google Earth   | -                | 14/09/2019 | 38N      | Eastern             | <1 m       |
| ASTER GDEM     | N43E041/E040     | 17/11/2011 | 37N      | Western             | 30 m       |
| ASTER GDEM     | N43E042/E043     | 17/11/2011 | 38N      | Central             | 30 m       |
| ASTER GDEM     | N42E045/E046     | 17/11/2011 | 38N      | Eastern             | 30 m       |

*Table S2. The Greater Caucasus glacier count and area change in 2000–2020 by individual river basins.*

| Main river basin         | Tributary river basin | Landsat 5/7<br>1999-2002 |                      | Sentinel<br>2019–2020 |                      | Area decrease<br>2000–2020 |                    |
|--------------------------|-----------------------|--------------------------|----------------------|-----------------------|----------------------|----------------------------|--------------------|
|                          |                       | Count                    | Area km <sup>2</sup> | Count                 | Area km <sup>2</sup> | %                          | % yr <sup>-1</sup> |
| Mzimta                   |                       | 13                       | 2.3±0.2              | 12                    | 1.6±0.1              | 30.4                       | 1.52               |
| Kuban                    | Belaya                | 52                       | 8.6±0.6              | 52                    | 6.2±0.4              | 27.9                       | 1.40               |
|                          | Malaya Laba           | 46                       | 9.2±0.7              | 41                    | 6.5±0.3              | 29.3                       | 1.47               |
|                          | Bolshaya Laba         | 31                       | 5.8±0.4              | 31                    | 3.5±0.2              | 39.7                       | 1.99               |
|                          | Bolshoy Zelenchuk     | 72                       | 30.4±1.6             | 86                    | 21.9±0.9             | 28.0                       | 1.40               |
|                          | Maliy Zelenchuk       | 42                       | 27.8±1.1             | 50                    | 21.6±0.7             | 22.3                       | 1.12               |
|                          | Teberda               | 103                      | 59.6±2.6             | 115                   | 44.8±1.4             | 24.8                       | 1.24               |
|                          | Daut                  | 23                       | 5.4±0.4              | 23                    | 3.5±0.2              | 35.2                       | 1.76               |
|                          | Uchkulan              | 70                       | 21.0±1.2             | 84                    | 14.5±0.7             | 31.0                       | 1.55               |
|                          | Ullukam               | 96                       | 47.1±2.2             | 103                   | 34.2±1.3             | 27.4                       | 1.37               |
| Malka                    |                       | 10                       | 55.7±0.9             | 13                    | 49.1±0.6             | 11.8                       | 0.59               |
| Baksan                   |                       | 152                      | 160.8±6.0            | 199                   | 126.4±3.6            | 21.4                       | 1.07               |
| Chegem                   | Bashil-Auzusu         | 28                       | 28.2±1.1             | 33                    | 21.8±0.6             | 22.7                       | 1.14               |
|                          | Gara-Auzusu           | 20                       | 28.1±1.1             | 25                    | 22.0±0.7             | 21.7                       | 1.09               |
|                          | Bulungu               | 9                        | 3.4±0.3              | 11                    | 2.3±0.1              | 32.4                       | 1.62               |
| Cherek                   | Cherek-Bezingskiy     | 41                       | 78.8±2.6             | 53                    | 68.4±1.7             | 13.2                       | 0.66               |
|                          | Cherek-Balkarskiy     | 87                       | 106.0±3.6            | 89                    | 86.1±2.3             | 18.8                       | 0.94               |
|                          | Psigansy              | 11                       | 14.3±0.6             | 14                    | 11.9±0.4             | 16.8                       | 0.84               |
| Urukh                    | Khanzidon             | 12                       | 7.1±0.3              | 13                    | 5.4±0.6              | 23.9                       | 1.20               |
|                          | Biliagikom            | 4                        | 1.6±0.04             | 5                     | 0.7±0.1              | 56.3                       | 2.82               |
|                          | Urukh headwaters      | 36                       | 28.2±1.2             | 46                    | 21.4±0.8             | 24.1                       | 1.21               |
|                          | Karaugom              | 25                       | 44.7±1.3             | 31                    | 39.5±0.8             | 11.6                       | 0.58               |
|                          | Aigamuga              | 20                       | 16.3±0.9             | 19                    | 12.8±0.5             | 21.5                       | 1.08               |
| Ardon                    | Tseyadon              | 19                       | 18.2±0.7             | 20                    | 15.7±0.4             | 13.7                       | 0.69               |
|                          | Sidan                 | 1                        | 0.05±0.005           | 1                     | 0.02±0.001           | 60.0                       | 3.00               |
|                          | Vilsa                 | 5                        | 1.0±0.05             | 4                     | 0.8±0.04             | 20.0                       | 1.00               |
|                          | Adaikom               | 7                        | 5.0±0.2              | 5                     | 3.9±0.1              | 22.0                       | 1.10               |
|                          | Mamikhdon             | 15                       | 4.4±0.3              | 16                    | 2.9±0.5              | 34.1                       | 1.71               |
|                          | Nar                   | 16                       | 2.7±0.2              | 8                     | 1.2±0.1              | 55.6                       | 2.78               |
|                          | Gilvan                | 1                        | 0.05±0.006           | 0                     | 0                    | -                          | -                  |
|                          | Kasaidon              | 2                        | 0.2±0.07             | 2                     | 0.2±0.004            | 0                          | 0                  |
|                          | Labagkomdon           | 1                        | 0.09±0.005           | 1                     | 0.08±0.004           | 11.1                       | 0.56               |
|                          | Baddon                | 8                        | 3.3±0.2              | 8                     | 2.0±0.4              | 39.4                       | 1.97               |
|                          | Arkhondon             | 4                        | 3.8±0.2              | 5                     | 3.3±0.1              | 13.2                       | 0.66               |
| Fiagdon                  |                       | 31                       | 7.8±0.5              | 19                    | 4.8±0.3              | 38.5                       | 1.93               |
| Gizeldon                 |                       | 25                       | 28.8±1.0             | 23                    | 22.2±0.7             | 22.9                       | 1.15               |
| Tergi (Terek) headwaters |                       | 106                      | 52.1±1.3             | 92                    | 41.3±1.1             | 20.7                       | 1.04               |
| Sunja right tributaries  | Assa                  | 15                       | 3.1±0.2              | 12                    | 1.9±0.1              | 38.7                       | 1.94               |
|                          | Arghuni               | 25                       | 6.7±0.5              | 20                    | 4.7±0.3              | 29.9                       | 1.50               |
|                          | Sharo Argun           | 35                       | 19.5±0.9             | 35                    | 14.3±0.6             | 26.7                       | 1.34               |
| Sulak                    | Andiyskoye Koysu      | 50                       | 16.3±1.0             | 42                    | 9.7±0.5              | 40.5                       | 2.03               |
|                          | Avarskoye Koysu       | 75                       | 14.5±1.1             | 34                    | 4.8±0.3              | 66.9                       | 3.35               |
| Samur                    |                       | 52                       | 8.9±0.6              | 12                    | 2.0±0.1              | 77.5                       | 3.88               |
| Agrichai                 | Shinchai              | 1                        | 0.03±0.002           | 0                     | 0                    | -                          | -                  |
| Kusarchai                |                       | 17                       | 2.6±0.3              | 11                    | 0.5±0.003            | 80.8                       | 4.04               |
| Bzipi                    |                       | 27                       | 5.9±0.4              | 33                    | 3.0±0.2              | 49.2                       | 2.46               |
| Kelasuri                 |                       | 2                        | 1.1±0.4              | 2                     | 0.8±0.03             | 27.3                       | 1.37               |

|                                |  |             |                    |             |                    |             |             |
|--------------------------------|--|-------------|--------------------|-------------|--------------------|-------------|-------------|
| Kodori                         |  | 190         | 54.9±3.3           | 198         | 36.2±1.8           | 34.1        | 1.71        |
| Enguri                         |  | 303         | 265.9±11.1         | 315         | 209.6±5.9          | 21.2        | 1.06        |
| Khobistkali                    |  | 12          | 0.7±0.01           | 11          | 0.5±0.01           | 28.6        | 1.43        |
| Rioni                          |  | 126         | 59.9±3.0           | 133         | 46.4±1.7           | 22.5        | 1.13        |
| Liakhvi                        |  | 11          | 2.4±0.2            | 12          | 1.7±0.1            | 29.2        | 1.46        |
| Aragvi                         |  | 1           | 0.6±0.005          | 1           | 0.4±0.002          | 33.3        | 1.67        |
| <b>Total, Greater Caucasus</b> |  | <b>2186</b> | <b>1381.5±58.2</b> | <b>2223</b> | <b>1060.9±33.6</b> | <b>23.2</b> | <b>1.16</b> |

**Table S3.** Characteristics of glaciers used for measuring length change. The average error terms are ±15 m.

| Name                                            | Country | Area 2000 (km <sup>2</sup> ) | Area 2020 (km <sup>2</sup> ) | Annual decrease in 2000–2020 (% yr <sup>-1</sup> ) | Glacier retreat in 2000–2020 (m) | Annual retreat in 2000–2020 (m yr <sup>-1</sup> ) |
|-------------------------------------------------|---------|------------------------------|------------------------------|----------------------------------------------------|----------------------------------|---------------------------------------------------|
| <b>Glaciers with &gt;10 km<sup>2</sup> area</b> |         |                              |                              |                                                    |                                  |                                                   |
| Bezingi                                         | Rus     | 39.4±0.9                     | 34.8±0.9                     | 0.6                                                | 292                              | 14.6                                              |
| Dykhsu                                          | Rus     | 33.6±0.9                     | 28.9±0.9*                    | 0.7                                                | 556                              | 27.8                                              |
| Lekhzi                                          | Geo     | 32.8±0.9                     | 28.2±0.8*                    | 0.7                                                | 1395                             | 69.8                                              |
| Karaugom                                        | Rus     | 28.8±0.8                     | 26.9±0.7*                    | 0.3                                                | 771                              | 38.6                                              |
| Tsaneri Southern                                | Geo     | 13.9±0.5                     | 12.7±0.5                     | 0.4                                                | 491                              | 24.6                                              |
| Tsaneri Northern                                | Geo     | 12.5±0.5                     | 11.5±0.5                     | 0.4                                                | 582                              | 29.1                                              |
| <b>Glaciers with 5-10 km<sup>2</sup> area</b>   |         |                              |                              |                                                    |                                  |                                                   |
| Shkhelda                                        | Rus     | 12.1±0.5                     | 9.9±0.4*                     | 0.9                                                | 624                              | 31.2                                              |
| Adishi                                          | Geo     | 10.2±0.4                     | 9.6±0.4                      | 0.3                                                | 415                              | 20.8                                              |
| Khalde                                          | Geo     | 10.2±0.4                     | 9.2±0.4                      | 0.5                                                | 328                              | 16.4                                              |
| Bashil                                          | Rus     | 7.7±0.3                      | 6.9±0.3                      | 0.5                                                | 555                              | 27.8                                              |
| Dolra                                           | Geo     | 6.1±0.2                      | 5.0±0.2                      | 0.9                                                | 178                              | 8.9                                               |
| <b>Glaciers with 1-5 km<sup>2</sup> area</b>    |         |                              |                              |                                                    |                                  |                                                   |
| Kirtisho                                        | Geo     | 4.8±0.2                      | 4.1±0.2                      | 0.7                                                | 366                              | 18.3                                              |
| Boko                                            | Geo     | 4.7±0.2                      | 4.5±0.2                      | 0.2                                                | 424                              | 21.2                                              |
| Leadast Northern                                | Geo     | 3.9±0.1                      | 3.3±0.1                      | 0.8                                                | 228                              | 11.4                                              |
| Kashkatash                                      | Rus     | 3.2±0.1                      | 2.8±0.1                      | 0.6                                                | 407                              | 20.4                                              |
| Marukh Northern                                 | Rus     | 3.1±0.1                      | 2.7±0.1*                     | 0.6                                                | 363                              | 18.2                                              |

\* in 2020 this glacier was already divided by several ice bodies

## Supplemental Figure

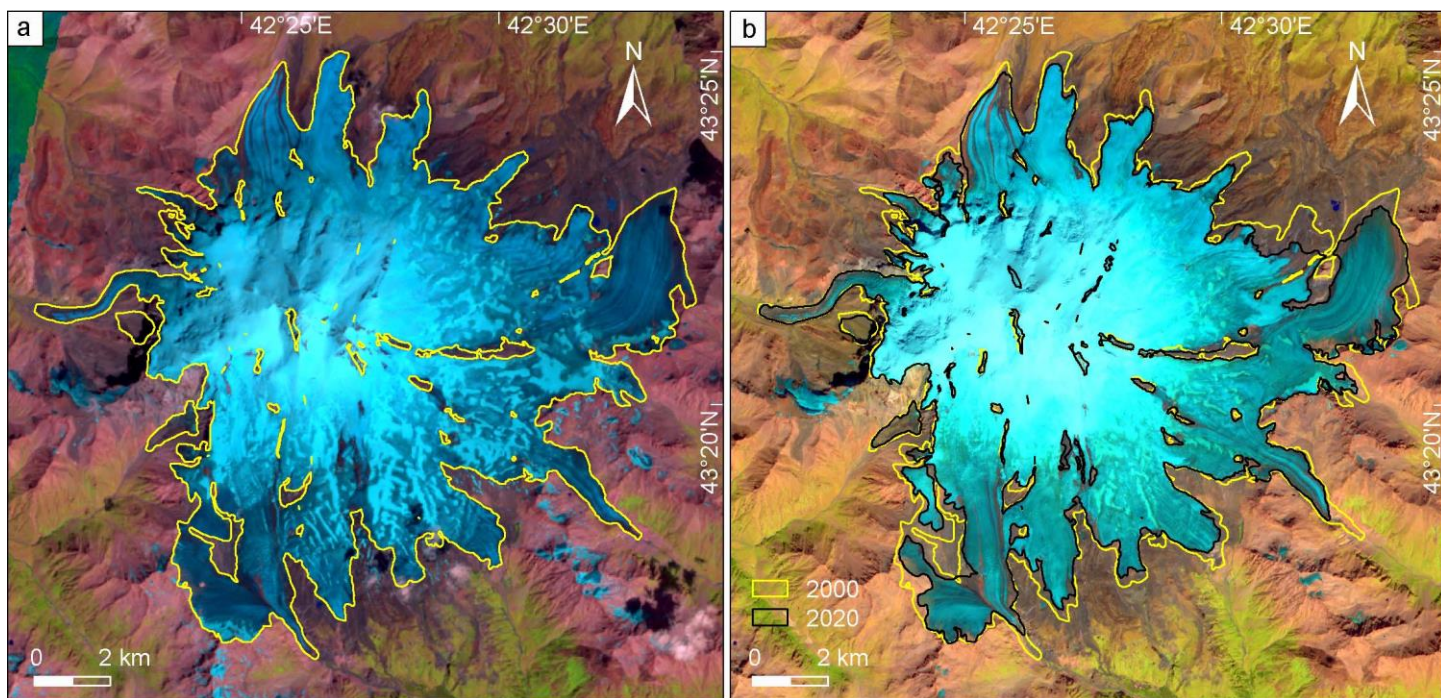

**Figure S1.** Changes in glacierized area of Elbrus in 2000-2020. (a) The 12 August 2000 Landsat 5 image is used as background. (b) The 4 September 2020 Sentinel 2 image is used as background.
